# Supplementary material for: 7-membered-ring effect on fluorescence quantum yield: does metal-complexation-induced twisting-inhibition of an amino GFP chromophore derivative enhance fluorescence?
Source: Royal Society of Chemistry journal article supplement (doi:10.1039/d3cp00467h), 2023-01-01
Supplement: d3cp00467h1.pdf [file d3cp00467h1.pdf]

Supporting Information

**7-Membered-ring effect on fluorescence quantum yield: Does metal-complexation-induced twisting-inhibition of an amino GFP chromophore derivative enhance fluorescence?**

*Hao-Wei Ke and Kuangsen Sung\**

Department of Chemistry, National Cheng Kung University, Tainan, Taiwan

| <u>Content</u>                                                                                                                                                                                                                                                                                                                                                                                                 | <u>Page</u> |
|----------------------------------------------------------------------------------------------------------------------------------------------------------------------------------------------------------------------------------------------------------------------------------------------------------------------------------------------------------------------------------------------------------------|-------------|
| 1. $^1\text{H}$ - and $^{13}\text{C}$ -NMR spectra of <i>o</i> -PABDI                                                                                                                                                                                                                                                                                                                                          | S2          |
| 2. Electronic absorption and fluorescence emission spectra for the titration of ( <i>Z</i> )- <i>o</i> -PABDI with various concentrations of $\text{Na}_2\text{SO}_4$ , $\text{Mg}(\text{NO}_3)_2$ , $\text{KClO}_4$ , $\text{CaCl}_2$ , $\text{Mn}(\text{ClO}_4)_2$ , $\text{FeCl}_3$ , $\text{Co}(\text{ClO}_4)_2$ , $\text{Ni}(\text{ClO}_4)_2$ , and $\text{Cu}(\text{ClO}_4)_2$ in $\text{CH}_3\text{CN}$ | S3-S7       |

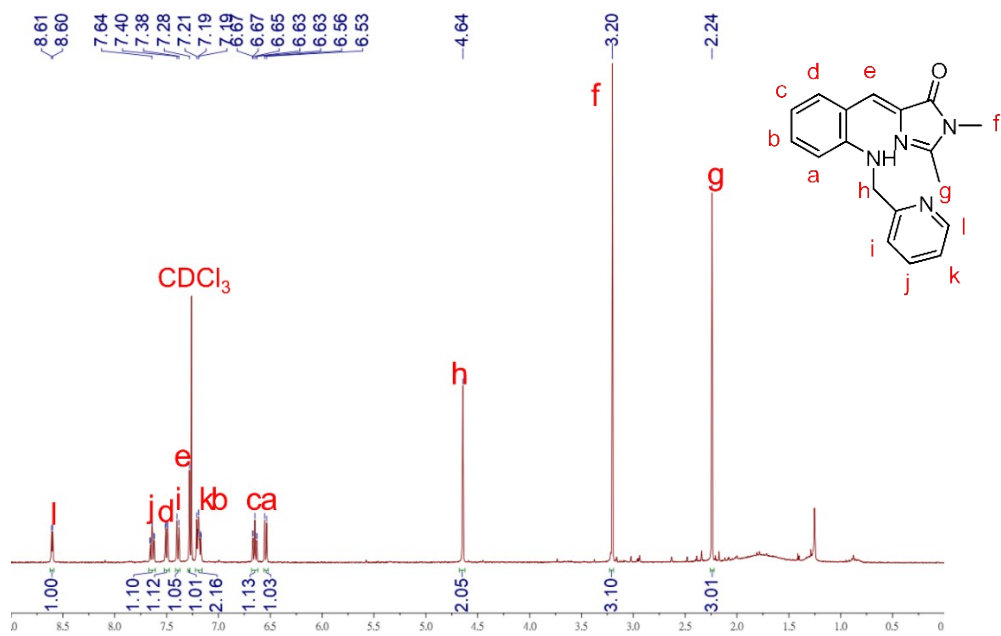

**Figure S1.**  $^1\text{H}$ -NMR spectrum of *o*-PABDI in  $\text{CDCl}_3$

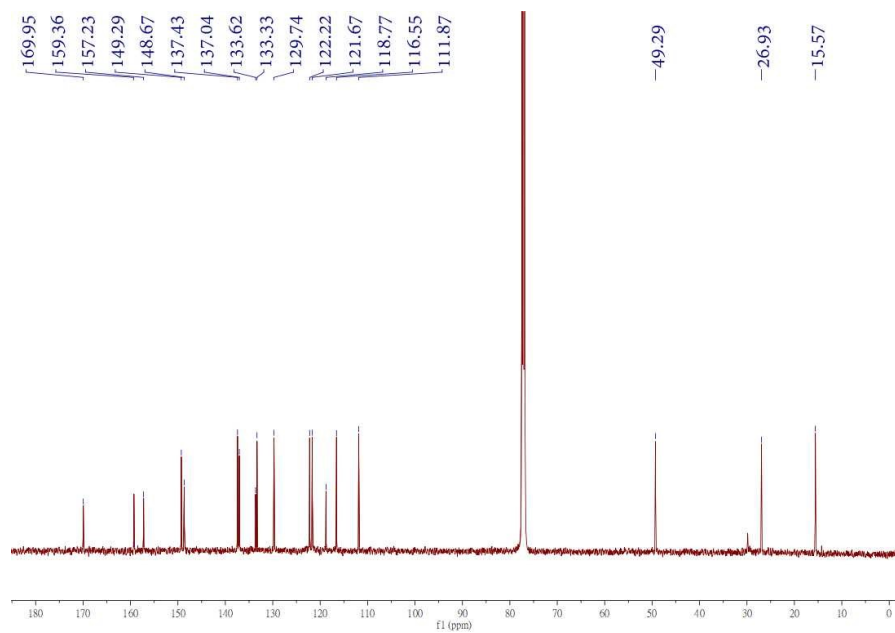

**Figure S2.**  $^{13}\text{C}$ -NMR spectrum of *o*-PABDI in  $\text{CDCl}_3$

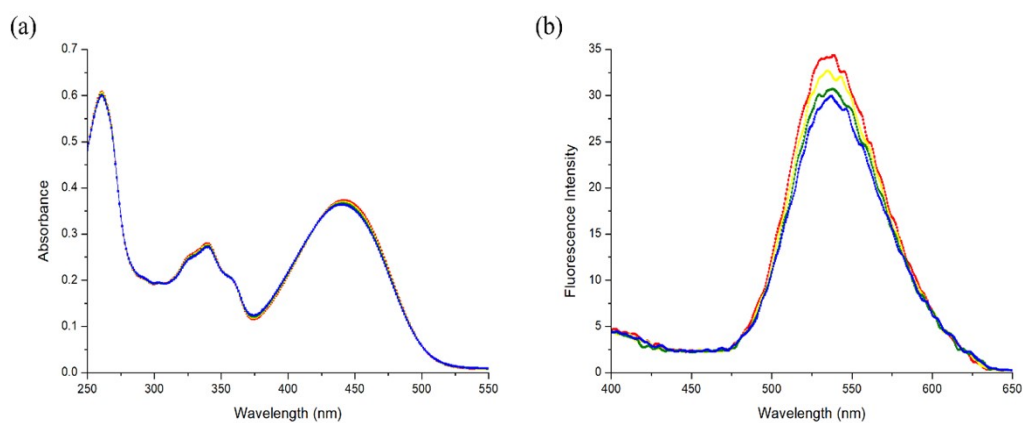

**Figure S3.** Electronic absorption (left) and fluorescence emission (right) spectra for the titration of (*Z*)-*o*-PABDI with various concentrations of Na<sub>2</sub>SO<sub>4</sub> in CH<sub>3</sub>CN

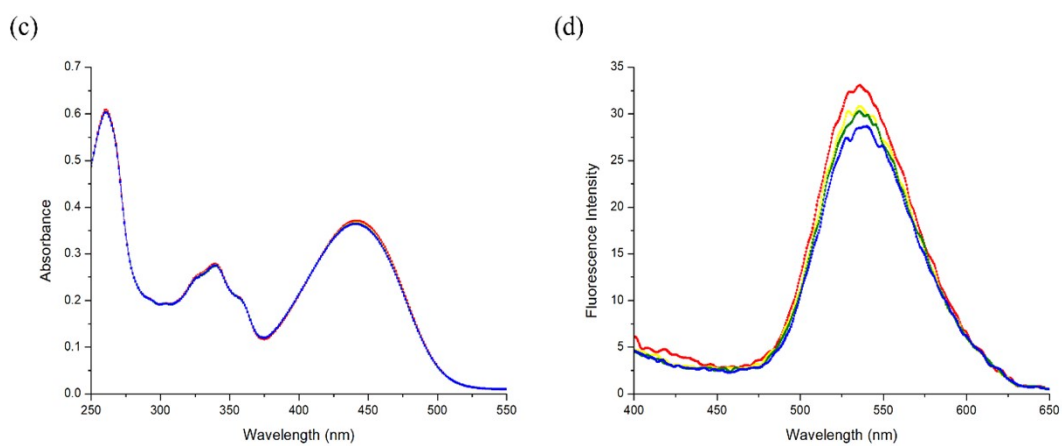

**Figure S4.** Electronic absorption (left) and fluorescence emission (right) spectra for the titration of (*Z*)-*o*-PABDI with various concentrations of Mg(NO<sub>3</sub>)<sub>2</sub> in CH<sub>3</sub>CN

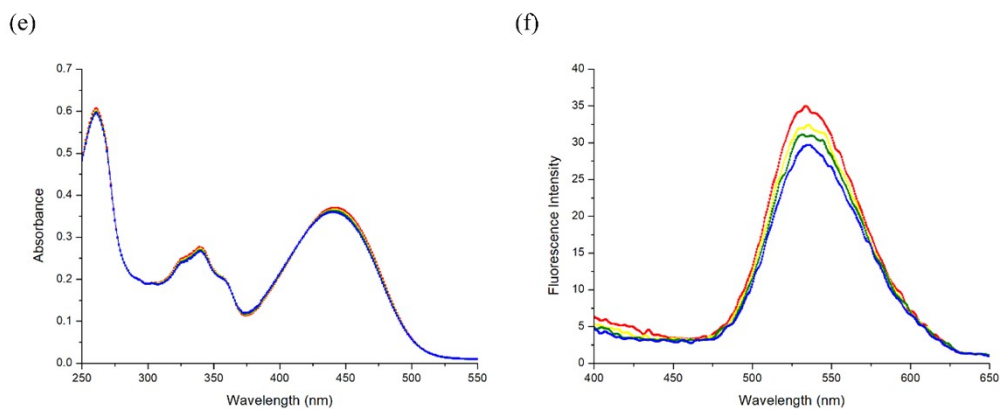

**Figure S5.** Electronic absorption (left) and fluorescence emission (right) spectra for the titration of (*Z*)-*o*-PABDI with various concentrations of  $\text{KClO}_4$  in  $\text{CH}_3\text{CN}$

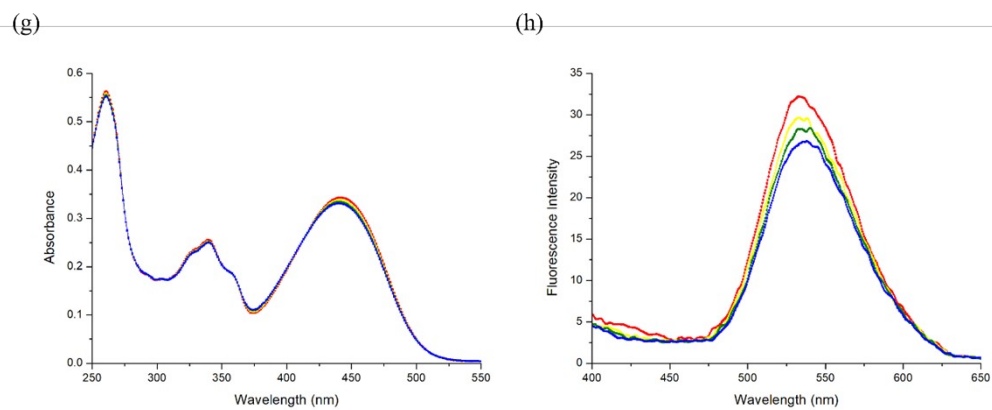

**Figure S6.** Electronic absorption (left) and fluorescence emission (right) spectra for the titration of (*Z*)-*o*-PABDI with various concentrations of  $\text{CaCl}_2$  in  $\text{CH}_3\text{CN}$

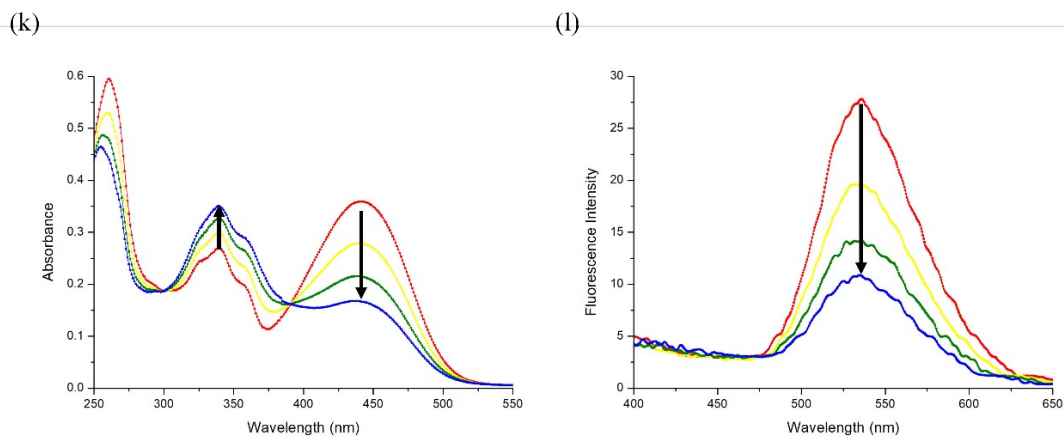

**Figure S7.** Electronic absorption (left) and fluorescence emission (right) spectra for the titration of (*Z*)-*o*-PABDI with various concentrations of Mn(ClO<sub>4</sub>)<sub>2</sub> in CH<sub>3</sub>CN

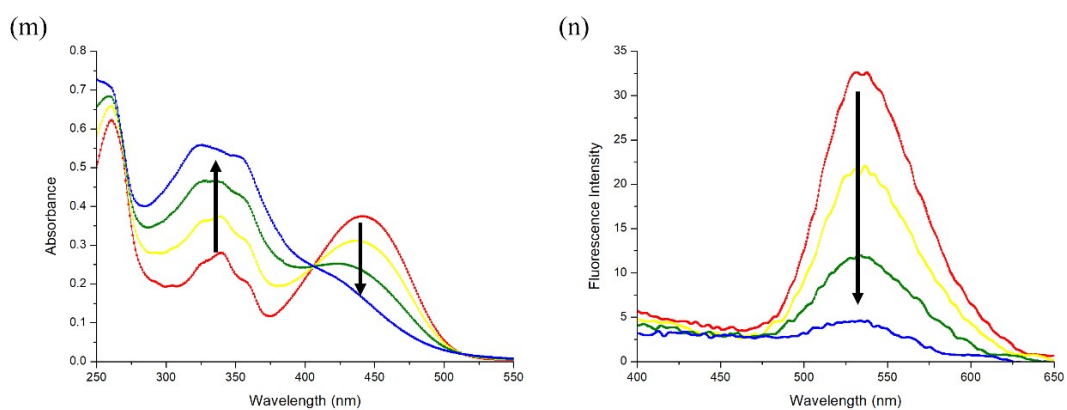

**Figure S8.** Electronic absorption (left) and fluorescence emission (right) spectra for the titration of (*Z*)-*o*-PABDI with various concentrations of FeCl<sub>3</sub> in CH<sub>3</sub>CN

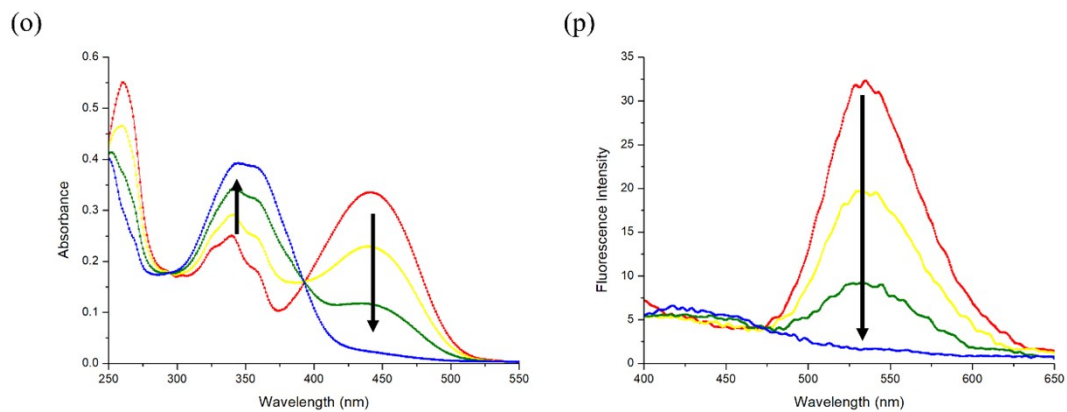

**Figure S9.** Electronic absorption (left) and fluorescence emission (right) spectra for the titration of (*Z*)-*o*-PABDI with various concentrations of Co(ClO<sub>4</sub>)<sub>2</sub> in CH<sub>3</sub>CN

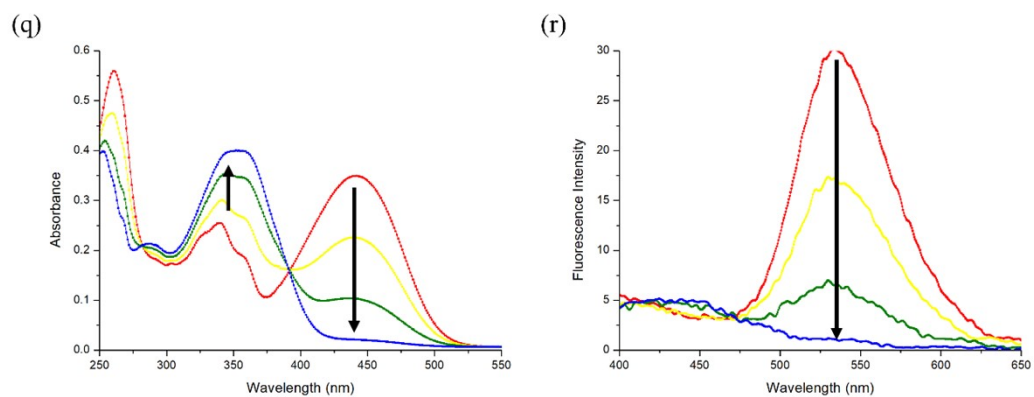

**Figure S10.** Electronic absorption (left) and fluorescence emission (right) spectra for the titration of (*Z*)-*o*-PABDI with various concentrations of Ni(ClO<sub>4</sub>)<sub>2</sub> in CH<sub>3</sub>CN

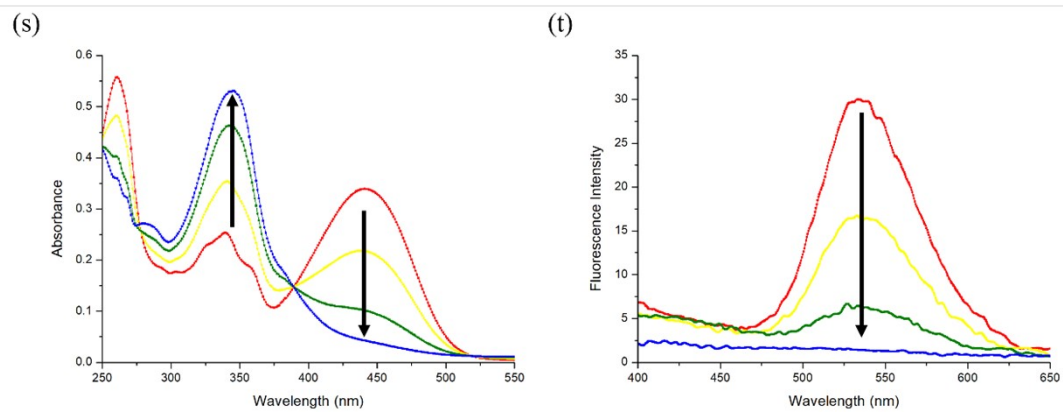

**Figure S11.** Electronic absorption (left) and fluorescence emission (right) spectra for the titration of (*Z*)-*o*-PABDI with various concentrations of Cu(ClO<sub>4</sub>)<sub>2</sub> in CH<sub>3</sub>CN
